# Supplementary material
Source: publisher site journal article supplement (https://www.oncotarget.com/lookup/doi/10.18632/oncotarget.26962)
Supplement: Supplementary file 1 [file oncotarget.26962]

## Correction

**Correction: A keratinocyte life cycle model identifies novel host genome regulation by human papillomavirus 16 relevant to HPV positive head and neck cancer**

**Michael R. Evans<sup>1</sup>, Claire D. James<sup>1</sup>, Oonagh Loughran<sup>1</sup>, Tara J. Nulton<sup>1</sup>, Xu Wang<sup>1</sup>, Molly L. Bristol<sup>1</sup>, Brad Windle<sup>1,2</sup> and Iain M. Morgan<sup>1,2</sup>**

<sup>1</sup> Department of Oral and Craniofacial Molecular Biology, VCU Philips Institute for Oral Health Research, Virginia Commonwealth University School of Dentistry, Richmond, VA, USA

<sup>2</sup> VCU Massey Cancer Center, Richmond, VA, USA

**Published:** May 14, 2019

**Copyright:** Evans et al. This is an open-access article distributed under the terms of the Creative Commons Attribution License 3.0 (CC BY 3.0), which permits unrestricted use, distribution, and reproduction in any medium, provided the original author and source are credited.

**This article has been corrected:** Due to errors in document preparation, The NOKs used in the original version of this manuscript were in fact N/Tert-1 (both are TERT immortalized, with NOKs being from gingival keratinocytes and N/Tert-1 from foreskin keratinocytes); the manuscript is now corrected accordingly. None of the results or the conclusions from the manuscript are in any way altered by this different genetic background; HPV16 reprograms N/Tert-1 cells similarly to HPV16 in head and neck cancer as determined by analysis of The Cancer Genome Atlas (TCGA). The HPV16 immortalized human tonsil keratinocytes remain a bridge between the results with HPV16 positive N/Tert-1 and TCGA data. The authors apologize for this error.

Original article: Oncotarget. 2017; 8:81892–81909. <https://doi.org/10.18632/oncotarget.18328>
